# Supplementary material
Source: PubMed Central journal article supplement (PMC2778274)
Supplement: NIHMS109414-supplement-Supplementary_Data.pdf [file NIHMS109414-supplement-Supplementary_Data.pdf]

| <b>Supplementary Table 1</b>                          |                    |                 |                                     |                             |             |
|-------------------------------------------------------|--------------------|-----------------|-------------------------------------|-----------------------------|-------------|
| <b>PSMB1 Resequencing Primers (for amplification)</b> |                    |                 |                                     |                             |             |
| Rxn                                                   | Forward or Reverse | Primer Location | Region Amplified by the Primer Pair | Primer Sequence             | Primer Name |
| 1^3                                                   | F                  | 5FR (-1252)     | 5' FR & Exon1                       | CGAACCGTCAGAAAAGAGTACAA     | Rxn1Fm      |
|                                                       | R                  | 11 (71)         |                                     | TGACTCCTAAATAGGCTTCAGCA     | Rxn3Rm      |
| 4                                                     | F                  | 11 (-74)        | Exon 2                              | ACTATGGAGCATTCTTCTATTTGTAGG | Rxn4Fm      |
|                                                       | R                  | 12 (171)        |                                     | GACTGCACATTAATTAATAGGAAACA  | Rxn4Rm      |
| 5                                                     | F                  | 12 (-127)       | Exon 3                              | GGGTGACTGTTTGTCCATTA        | Rxn5F       |
|                                                       | R                  | 13 (195)        |                                     | TGCTGCTGTTTCACATTATGC       | Rxn5R       |
| 6                                                     | F                  | 13 (-145)       | Exon 4                              | CTGTGTTGGTTGATCATGAAGG      | Rxn6F       |
|                                                       | R                  | 14 (219)        |                                     | TAGCAAAATAACTGGCTGCTCA      | Rxn6R       |
| 7                                                     | F                  | 14 (-110)       | Exon 5                              | TAGCCAAGGTGATAGTCCGTTT      | Rxn7F       |
|                                                       | R                  | 15 (191)        |                                     | AGGCAGAACACAGAGAGAGACC      | Rxn7R       |
| 8                                                     | F                  | 15 (-78)        | Exon 6                              | GGGTATTGGAAGAACTTGAACC      | Rxn8Fm      |
|                                                       | R                  | 3'FR (918)      |                                     | ATAGAAAAGGGTGGGAAAAATGA     | Rxn8Rm      |

  

| <b>PSMB2 Resequencing Primers (for amplification)</b> |                    |                 |                                     |                            |             |
|-------------------------------------------------------|--------------------|-----------------|-------------------------------------|----------------------------|-------------|
| Rxn                                                   | Forward or Reverse | Primer Location | Region Amplified by the Primer Pair | Primer Sequence            | Primer Name |
| 1^3                                                   | F                  | 5FR (-1126)     |                                     | CTCCCATTGGTTTGTAGGAATATC   | Rxn1Fm      |
|                                                       | R                  | 11 (95)         |                                     | TCAGATCCTCCCTGGTACTTATTC   | Rxn3Rm      |
| 4                                                     | F                  | 11 (-151)       |                                     | TTTTGATCCATAGTTTGTGAATTGT  | Rxn4F       |
|                                                       | R                  | 12 (223)        |                                     | TACAAAGAGAAAAATCACGTGAAGAC | Rxn4R       |
| 5                                                     | F                  | 12 (-161)       |                                     | GAGGAAAGGGACTAGAGTAGGATTG  | Rxn5F       |
|                                                       | R                  | 13 (156)        |                                     | GCACAAAGACATTGGACTTAAGAAAT | Rxn5R       |
| 6^7                                                   | F                  | 13 (7112)       |                                     | AATGGGAAAGAATATGTAGGAAAGG  | Rxn6F       |
|                                                       | R                  | 13 (8160)       |                                     | AAATGACCACTAAAAACAGAACAGC  | Rxn7R       |
| 8                                                     | F                  | 13 (-127)       |                                     | ATTGTGATTTACTCAGTTGCTGCT   | Rxn8F       |
|                                                       | R                  | 14 (190)        |                                     | ACTTACATCAGCTTTTGGAAAGACC  | Rxn8R       |
| 9                                                     | F                  | 14 (-161)       |                                     | GAGTAAGTTGATTGCAGGCTAGAAG  | Rxn9F       |
|                                                       | R                  | 15 (140)        |                                     | GGTAGCAACTTCACATCTGGTTAGT  | Rxn9R       |
| 10                                                    | F                  | 15 (-137)       |                                     | CAACTGCCTCCAGTAGAATATCAGT  | Rxn10F      |
|                                                       | R                  | 3'FR (921)      |                                     | TATGAAAGAGCTAGTTGGAAGGAA   | Rxn10R      |

  

| <b>PSMB5 Resequencing Primers (for amplification)</b> |                    |                 |                                           |                         |                    |
|-------------------------------------------------------|--------------------|-----------------|-------------------------------------------|-------------------------|--------------------|
| Rxn                                                   | Forward or Reverse | Primer Location | Region amplified by the Primer pair       | Primer Sequence         | Primer Name        |
| 1^3                                                   | F                  | 5FR (-1018)     | 5' FR & Exon1                             | AGCAGGAGGCAACATTTTCATA  | Rxn1Fm             |
|                                                       | R                  | 11 (403)        |                                           | TCATGCCAGTTTCAGTTACCC   | Rxn3Rm             |
| 4                                                     | F                  | 11 (-84)        | Exon 2                                    | TTTGGATTGATGCAAAAAGAAGT | Rxn4Fm             |
|                                                       | R                  | 12 (85)         |                                           | ACCAAGCCCTTTAATTCATCTGT | Rxn4Rm             |
| 5^6                                                   | F                  | 12 (-31)        | Exon 3                                    | TTTTTCTGCTAACCTCATCTCC  | Rxn5Fm             |
|                                                       | R                  | 3'FR (1461)     |                                           | ACTACTGCTTTCACAGCCACTTC | Rxn6Rm             |
| <b>Forward or Reverse</b>                             |                    |                 |                                           |                         | <b>Primer Name</b> |
| F                                                     |                    | 3'-FR           | AAAGGGGGTACCTGGAAGGGCCTTCAATTGTATCAGTACTT |                         | PSMB5 Acc65I F     |
| R                                                     |                    | 3'-FR           | AAAGGGGCTCGAGACTACTGCTTTCACAGCCACTTC      |                         | PSMB5 XhoI R       |
| <b>Forward or Reverse</b>                             |                    |                 |                                           |                         | <b>Primer Name</b> |
| F                                                     |                    | Exon1           | CGGAC TTGGGGGTIG TGCAGATCTGCT             |                         | PSMB5Cys24F        |
| R                                                     |                    | Exon1           | AGCAGATCTGCACAACCCCAAGTCCG                |                         | PSMB5Cys24R        |
| F                                                     |                    | Exon3           | GTGGAGCAG GCCTGTGATC TGGCCCGT             |                         | PSMB5Cys212F       |
| R                                                     |                    | Exon3           | ACGGGCCAGATCAAGGCCTGCTCCAC                |                         | PSMB5Cys212R       |
| F                                                     |                    | Exon3           | CA ACCTTACCA CATGCGGGAGGAT                |                         | PSMB5Met238F       |
| R                                                     |                    | Exon3           | ATCCTCCCGCAIGTGGTAGAGGTTG                 |                         | PSMB5Met238R       |
| F                                                     |                    | 3'-FR           | GTCAAATAAGCCAAGACAGTGAAGGGAAG             |                         | PSMB51094F         |
| R                                                     |                    | 3'-FR           | GTCAAATAAGCCAAGACAGTGAAGGGAAG             |                         | PSMB51094R         |
| F                                                     |                    | 3'-FR           | GCCTGTGTTGCTCTTTTGTCCA                    |                         | PSMB51042F         |
| R                                                     |                    | 3'-FR           | TGGACAAAAGACGCAACACAGGC                   |                         | PSMB51042R         |

**Supplementary Table 1. Primers for resequencing studies, for creating luciferase constructs and for mutagenesis.** Primers used for *PSMB1*, *PSMB2* and *PSMB5* gene resequencing, for the creation of luciferase constructs and for mutagenesis studies are listed. The nucleotide numbering scheme is that described in the legend for **Table 1**. “U” is upstream, “F” is forward, “R” is reverse, “I” is intron and “UTR” is untranslated region. Acc65I and XhoI restriction sites are underlined in the sequences of primers used to create reporter gene constructs. Primers used to perform mutagenesis to create variant allozyme expression constructs for PSMB5, including PSMB5 Cys24, Cys212 and Met238, are also listed. The nucleotide alteration in each primer is underlined.

| <b>Supplementary Table 2</b>                                      |             |             |          |
|-------------------------------------------------------------------|-------------|-------------|----------|
| <b><i>PSMB1</i>: Genetic Diversity and Neutrality Test Values</b> |             |             |          |
| Population                                                        | pi          | theta       | Tajima D |
| African-American                                                  | 6.80 ± 4.27 | 10.0 ± 3.37 | -0.88    |
| Caucasian-American                                                | 6.80 ± 4.26 | 6.26 ± 2.41 | 0.21     |
| Han Chinese-American                                              | 3.71 ± 2.71 | 5.01 ± 2.08 | -0.61    |
| Mexican-American                                                  | 7.72 ± 4.72 | 9.39 ± 3.21 | -0.48    |
| <b><i>PSMB2</i>: Genetic Diversity and Neutrality Test Values</b> |             |             |          |
| Population                                                        | pi          | theta       | Tajima D |
| African-American                                                  | 6.91 ± 4.08 | 12.3 ± 3.72 | -1.3     |
| Caucasian-American                                                | 0.67 ± 0.82 | 2.79 ± 1.28 | -1.66    |
| Han Chinese-American                                              | 1.61 ± 1.40 | 6.04 ± 2.15 | -1.93    |
| Mexican-American                                                  | 2.05 ± 1.64 | 7.46 ± 2.51 | -1.98    |
| <b><i>PSMB5</i>: Genetic Diversity and Neutrality Test Values</b> |             |             |          |
| Population                                                        | pi          | theta       | Tajima D |
| African-American                                                  | 5.45 ± 3.68 | 7.60 ± 2.84 | -0.72    |
| Caucasian-American                                                | 6.03 ± 3.97 | 4.84 ± 2.10 | 0.56     |
| Han Chinese-American                                              | 3.15 ± 2.49 | 4.85 ± 2.11 | -0.80    |
| Mexican-American                                                  | 4.56 ± 3.23 | 4.15 ± 1.91 | 0.22     |

Supplementary Table 2. Estimates of values for  $\pi$ ,  $\theta$  and Tajima's  $D$  for *PSMB1*, *PSMB2* and *PSMB5* in four ethnic groups. Values are parameter estimate means ± S.E.M.  $p$ -Values refer to Tajima's  $D$ .
